# Supplementary material for: Absorption of 10-hydroxycamptothecin on Fe3O4 magnetite nanoparticles with layer-by-layer self-assembly and drug release response
Source: Royal Society of Chemistry journal article supplement (doi:10.1039/c0dt01455a), 2011-01-01
Supplement: c0dt01455a.pdf [file c0dt01455a.pdf]

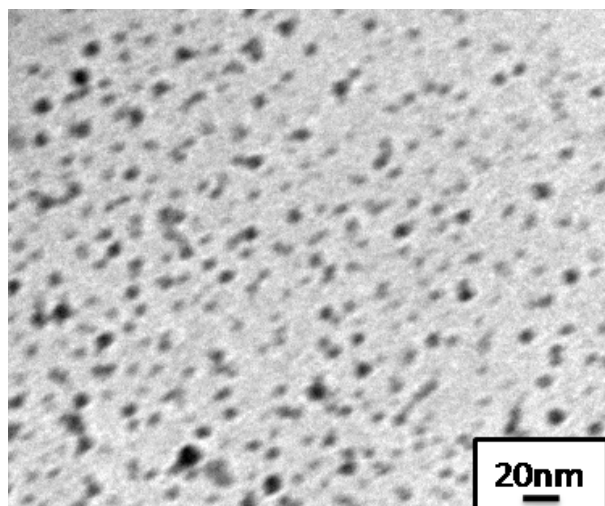

Fig.1 the TEM image of  $\text{Fe}_3\text{O}_4$  nanoparticles

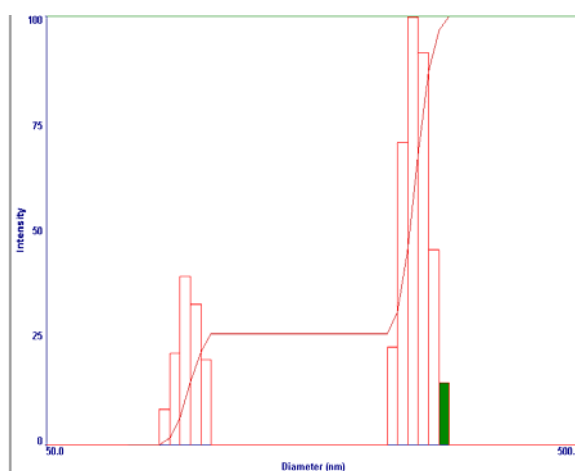

Fig.2 the size-diameter distribution of  $\text{Fe}_3\text{O}_4$ -HCPT in 0.4 M NaCl

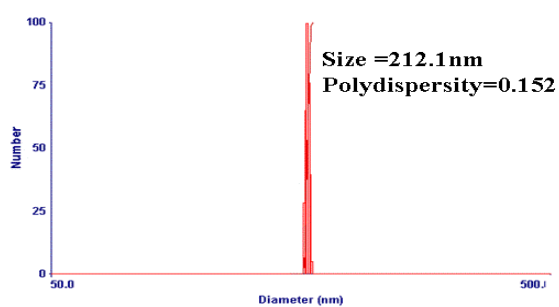

Fig.3 the size-diameter distribution of  $\text{Fe}_3\text{O}_4$ -HCPT@ $\text{SiO}_2$  in 0.4 M NaCl

In order to confirm purity of  $\text{Fe}_3\text{O}_4$  nanoparticles, The XPS of  $\text{Fe}_3\text{O}_4$  nanoparticles have been carried out. The experimental results show our product is not  $\text{Fe}_2\text{O}_3$  but  $\text{Fe}_3\text{O}_4$ , there are some  $\text{FeOOH}$  on the surface of the  $\text{Fe}_3\text{O}_4$ . The figure was as followed:

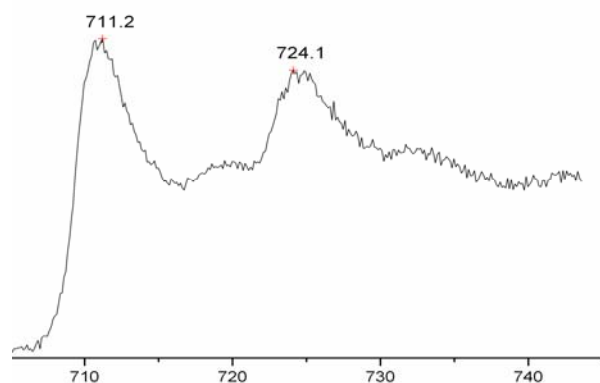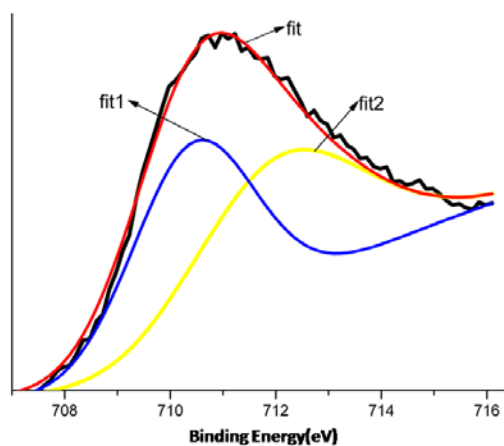

Experimental data are black. the red lines are fitted curves using two Gaussian-Lorentzian mixed peaks, one for the iron component of FeOOH (yellow line at 711.99eV) and the other for the iron component of Fe<sub>3</sub>O<sub>4</sub> (blue line at 710.38 eV).

#### Curve Fit Summary

Filename: Fe<sub>3</sub>O<sub>4</sub>

Area: 1

Region: 3

Comment:

Goodness of Fit: 1.520

Number of Completed Iterations: 8

---

| Band No. | Peak Pos. | Delta | Height | FWHM | % Gauss | Area | Total Area |
|----------|-----------|-------|--------|------|---------|------|------------|
| 2        | 711.99    | 1.61  | 831    | 3.88 | 84      | 3699 | 50.48      |
| 1        | 710.38    | 0.00  | 1239   | 2.75 | 100     | 3628 | 49.52      |
